# Supplementary material for: Experimental Evolution Reveals Genome-Wide Spectrum and Dynamics of Mutations in the Rice Blast Fungus, Magnaporthe oryzae
Source: PubMed Central journal article supplement (PMC3669265; doi:10.1371/journal.pone.0065416), 2013-05-31

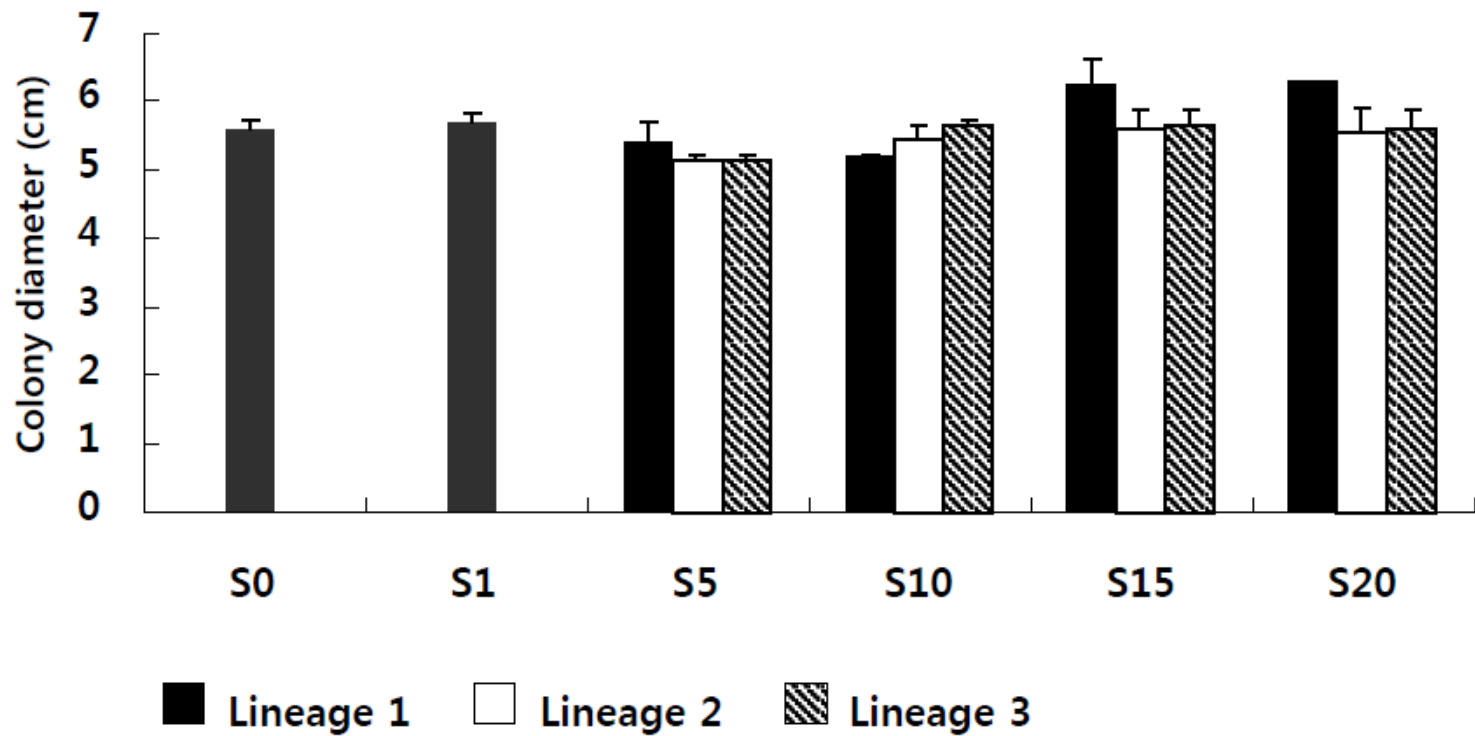

Supplement: pone.0065416.s001.pdf [file pone.0065416.s001.pdf]
