# Supplementary material for: Experimental Evolution Reveals Genome-Wide Spectrum and Dynamics of Mutations in the Rice Blast Fungus, Magnaporthe oryzae
Source: PubMed Central journal article supplement (PMC3669265; doi:10.1371/journal.pone.0065416), 2013-05-31

EcoRI

S0 S1 S1 #1 S20-1 S20-1 #1 S20-2 S20-2 #1 S20-2 #2 S20-3 S20-3 #1 S20-3 #2 S20-3 #3

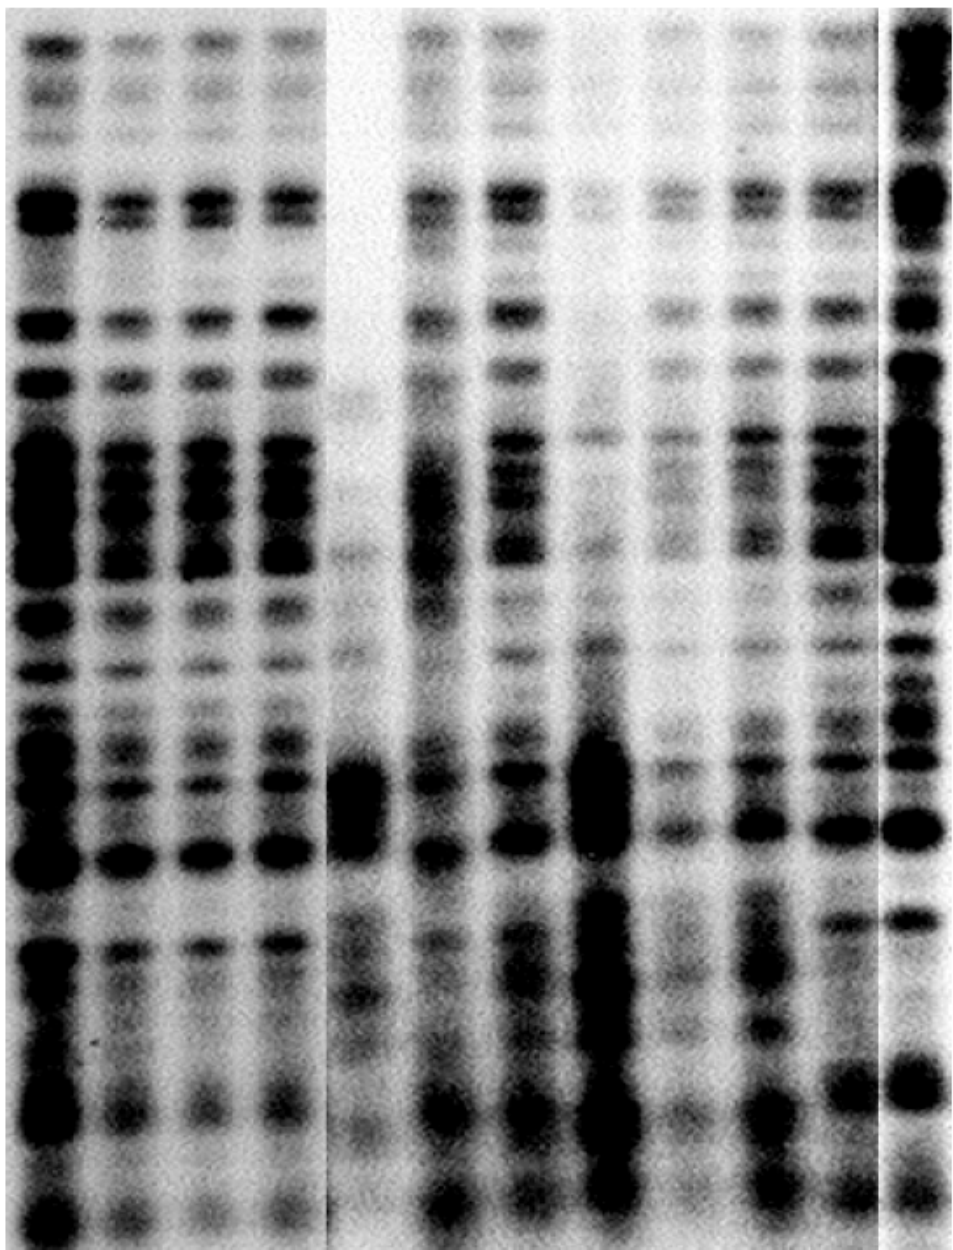

HindIII

S0 S1 S1 #1 S20-1 S20-1 #1 S20-2 S20-2 #1 S20-2 #2 S20-3 S20-3 #1 S20-3 #2 S20-3 #3

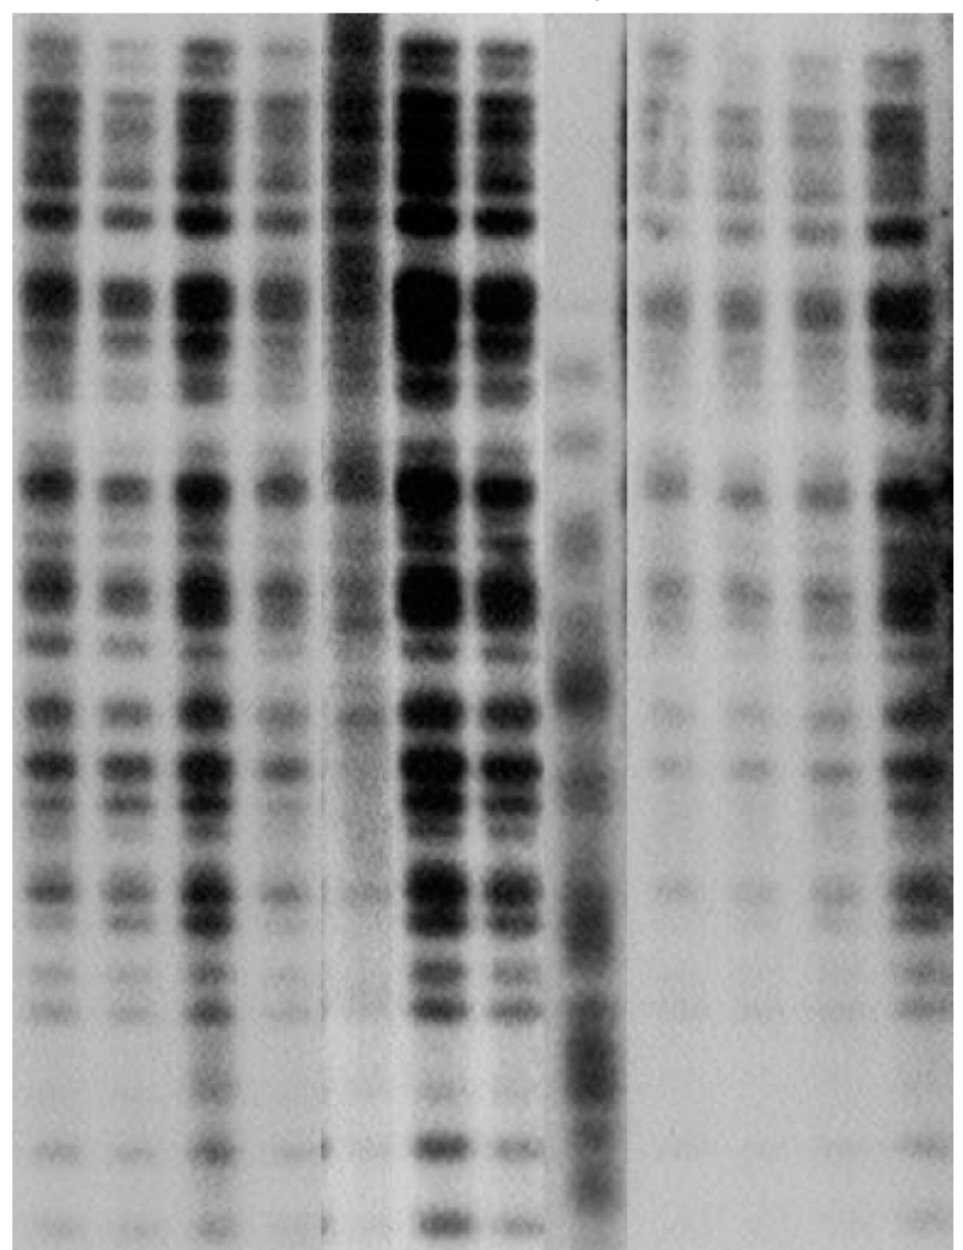

Supplement: pone.0065416.s004.pdf [file pone.0065416.s004.pdf]
