# Supplementary material for: Experimental Evolution Reveals Genome-Wide Spectrum and Dynamics of Mutations in the Rice Blast Fungus, Magnaporthe oryzae
Source: PubMed Central journal article supplement (PMC3669265; doi:10.1371/journal.pone.0065416), 2013-05-31
Supplement: pone.0065416.s005.pdf [file pone.0065416.s005.pdf]

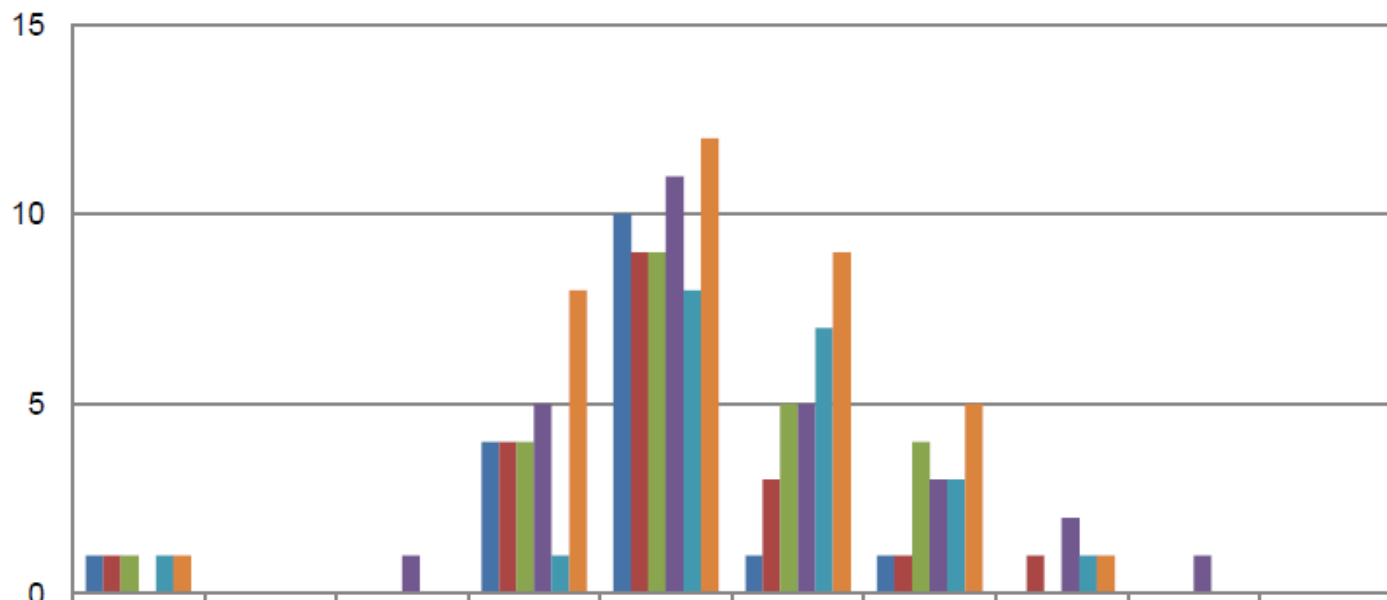

|         | -5 | -4 | -3 | -2 | -1 | 1 | 2 | 3 | 4 | 5 |
|---------|----|----|----|----|----|---|---|---|---|---|
| ■ S10-1 | 1  | 0  | 0  | 4  | 10 | 1 | 1 | 0 | 0 | 0 |
| ■ S10-2 | 1  | 0  | 0  | 4  | 9  | 3 | 1 | 1 | 0 | 0 |
| ■ S10-3 | 1  | 0  | 0  | 4  | 9  | 5 | 4 | 0 | 0 | 0 |
| ■ S20-1 | 0  | 0  | 1  | 5  | 11 | 5 | 3 | 2 | 1 | 0 |
| ■ S20-2 | 1  | 0  | 0  | 1  | 8  | 7 | 3 | 1 | 0 | 0 |
| ■ S20-3 | 1  | 0  | 0  | 8  | 12 | 9 | 5 | 1 | 0 | 0 |
