# Supplementary material for: Experimental Evolution Reveals Genome-Wide Spectrum and Dynamics of Mutations in the Rice Blast Fungus, Magnaporthe oryzae
Source: PubMed Central journal article supplement (PMC3669265; doi:10.1371/journal.pone.0065416), 2013-05-31

# Strain

S<sub>10-1</sub>

S<sub>10-2</sub>

S<sub>10-3</sub>

S<sub>20-1</sub>

S<sub>20-2</sub>

S<sub>20-3</sub>

1

2

3

4

5

6

7

NA

Chromosome

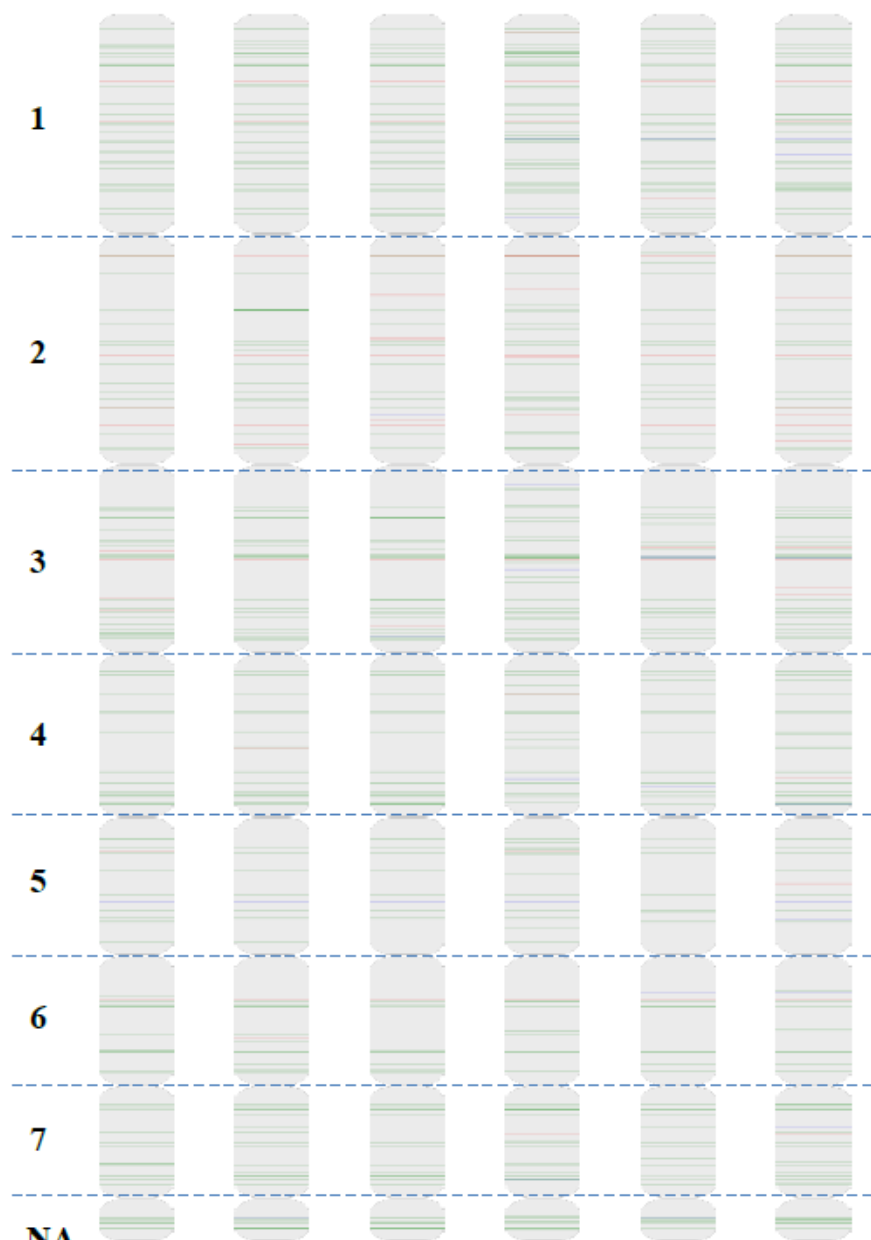

Supplement: pone.0065416.s006.pdf [file pone.0065416.s006.pdf]
